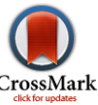

Correction

# Correction: Apamin Does Not Inhibit Human Cardiac Na<sup>+</sup> Current, L-type Ca<sup>2+</sup> Current or Other Major K<sup>+</sup> Currents

The PLOS ONE Staff

There are errors in the published article. In the Results, and in the Abstract, all numbers appearing in square parentheses are data numbers, not reference numbers, and should not be hyperlinked to references.

There are errors in Figures 1 and 4. The y-axis is missing from the graphs in Figure 1(B) and in Figure 4(A) and (B). Please view the correct figures below.

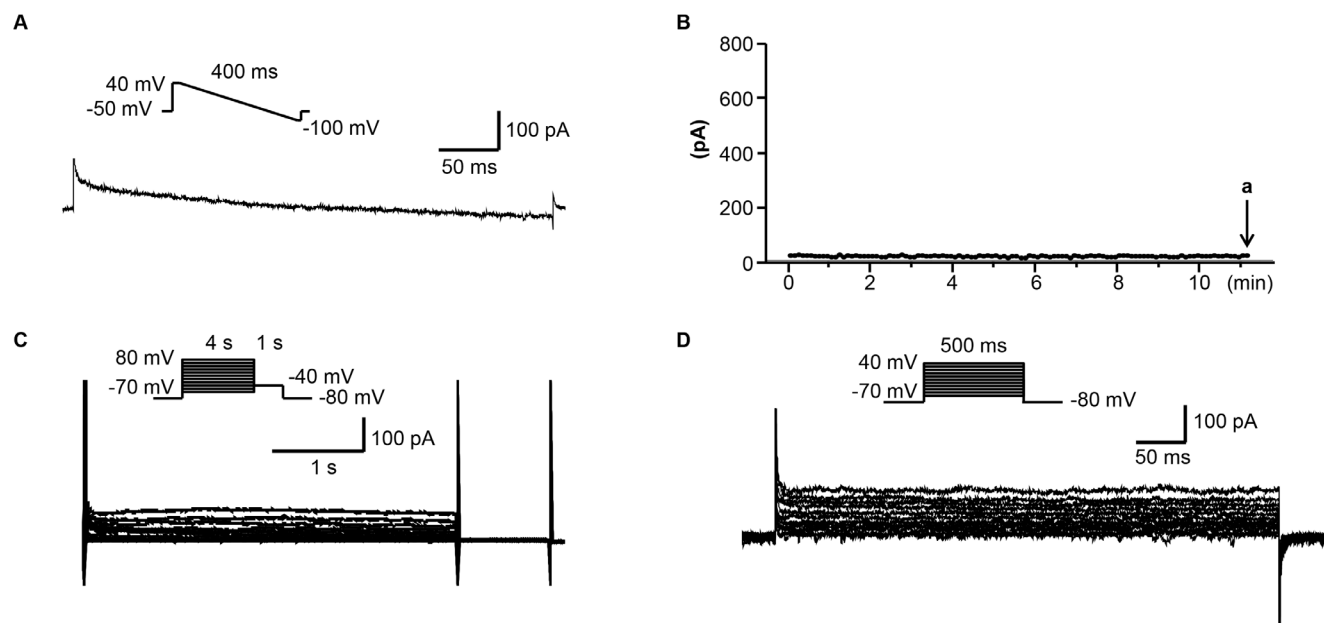

**Figure 1. The endogenous K<sup>+</sup> currents of HEK 293 cells.** (A) The representative tracing obtained with ramp protocol shown in the inset at time point indicated by arrow a in (B). The pipette and bath solutions are the same as the ones used in measuring  $I_{SK2}$ . (B) The time course of  $I_{SK2}$  measured at 0 mV. (C) The representative tracings obtained with the pulse protocol shown in the inset with the pipette and bath solution used in measuring  $I_{KS}$ . (D) The representative tracings obtained with the pulse protocol shown in the inset with the pipette and bath solutions used in measuring  $I_{Kr}$ ,  $I_{K1}$  and  $I_{to}$ .  
doi:10.1371/journal.pone.0096691.g001

**Citation:** The PLOS ONE Staff (2014) Correction: Apamin Does Not Inhibit Human Cardiac Na<sup>+</sup> Current, L-type Ca<sup>2+</sup> Current or Other Major K<sup>+</sup> Currents. PLoS ONE 9(7): e104445. doi:10.1371/journal.pone.0104445

**Published:** July 30, 2014

**Copyright:** © 2014 The PLOS ONE Staff. This is an open-access article distributed under the terms of the Creative Commons Attribution License, which permits unrestricted use, distribution, and reproduction in any medium, provided the original author and source are credited.

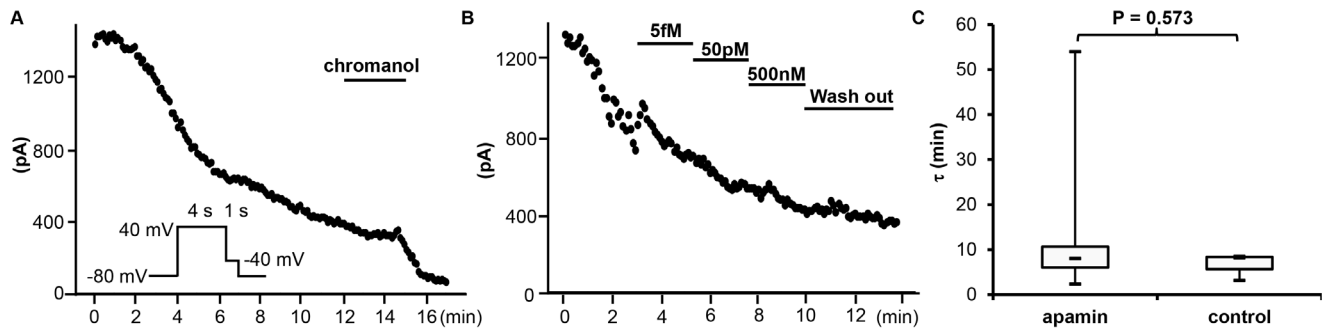

**Figure 4. Effects of different concentrations of apamin on the rundown course of  $I_{Ks}$  in transfected HEK 293 cells.** (A) An observation experiment without apamin treatment showing time-dependent rundown, obtained with the pulse protocol shown in the inset with chromanol 293B at the end. (B) The representative time course of  $I_{Ks}$  treated with different concentrations of apamin. (C) The time constant ( $\tau$ ) of the rundown curve with ( $n = 10$ ) and without ( $n = 3$ ) apamin. doi:10.1371/journal.pone.0096691.g004

## Reference

1. Yu C-C, Ai T, Weiss JN, Chen P-S (2014) Apamin Does Not Inhibit Human Cardiac  $Na^+$  Current, L-type  $Ca^{2+}$  Current or Other Major  $K^+$  Currents. PLoS ONE 9(5): e96691. doi:10.1371/journal.pone.0096691
